# Supplementary material for: Extracellular Matrix Proteome and Phosphoproteome of Potato Reveals Functionally Distinct and Diverse Canonical and Non-Canonical Proteoforms
Source: MDPI journal article supplement (doi:10.3390/proteomes4030020), 2016-06-24
Supplement: s1 [file s1]

**Table S3.** Domain analysis of ECM proteins.

| Spot ID <sup>a</sup> | Protein Name      | Protein ID <sup>b</sup> | Interpro/Pfam <sup>c</sup> | Domain Name <sup>d</sup>                   |
|----------------------|-------------------|-------------------------|----------------------------|--------------------------------------------|
| StEP-354             | Unknown           | 118486367               | IPR023214                  | HAD-like domain                            |
|                      |                   |                         | IPR006357                  | HAD-superfamily hydrolase, subfamily IIA   |
|                      |                   |                         | IPR023215                  | Nitrophenylphosphatase-like domain         |
|                      |                   |                         | IPR006349                  | 2-phosphoglycolate phosphatase, eukaryotic |
| StEP-346             | Predicted protein | 224103823               | IPR008162                  | Inorganic pyrophosphatase                  |
| StEP-638             | Os03g0822200      | 115456265               | IPR016040                  | NAD(P)-binding domain                      |

<sup>a</sup> Spot number as given on the 2-D gel images. The first letters (St) signify the source plant, *Solanum tuberosum*, followed by EP denotes the Extracellular Matrix Proteome. The numerals indicate the spot numbers corresponding to Figure 3A. <sup>b</sup> Protein identification number as in GenBank. <sup>c</sup> InterPro domain accession number.
